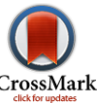

# Acute Pretreatment with Chloroquine Attenuates Renal I/R Injury in Rats

Zoran Todorovic<sup>1</sup>, Branislava Medic<sup>1</sup>, Gordana Basta-Jovanovic<sup>2</sup>, Sanja Radojevic Skodric<sup>2</sup>, Radan Stojanovic<sup>1</sup>, Branislav Rovcanin<sup>3</sup>, Milica Prostran<sup>1\*</sup>

**1** Department of Pharmacology, Clinical Pharmacology and Toxicology, Faculty of Medicine, University of Belgrade, Belgrade, Serbia, **2** Department of Pathology, Faculty of Medicine, University of Belgrade, Belgrade, Serbia, **3** Department of Human Genetics, Faculty of Medicine, University of Belgrade, Belgrade, Serbia

## Abstract

**Background:** Acute kidney injury (AKI) still remains an unresolved problem in pharmacotherapy and renal inflammation is a major factor in its development. Chloroquine, a well-known antimalarial drug, possesses pleiotropic effects as well: antiinflammatory, anticoagulant and vascular actions. The effects of chloroquine on renal function may involve significant increase in urine flow rate, glomerular filtration rate and sodium excretion, as well as stimulation of nitric oxide synthase. However, its role in experimental models of renal I/R injury is unknown. We aimed to analyze the acute effects of a single-dose intravenous chloroquine administered at three different times in the experimental model of I/R injury in rat.

**Methods:** Rats were subjected to bilateral renal ischemia (45 min) followed by reperfusion with saline lasting 4 hours. Chloroquine was administered in doses of 0.3 mg/kg i.v. and 3 mg/kg i.v. 30 min before ischemia, 30 min before reperfusion and 5 min before reperfusion. Selected hemodynamic, biochemical and morphological parameters were followed in the Sham-operated animals and rats subjected to I/R injury and pretreated with saline or chloroquine.

**Results:** Chloroquine (0.3 and 3 mg/kg, i.v.) protected the I/R injured kidney in an U-shaped manner. Both doses were protective regarding biochemical and histological markers of the I/R injury (serum urea, creatinine and fractional excretion of sodium, as well as total histological score, tubular necrosis score and KIM-1 staining score) ( $P < 0.05$  vs. corresponding controls, i.e. rats subjected to I/R injury and treated with saline only). The protective effects of the lower dose of chloroquine were more profound. Time-related differences between pretreatments were not observed ( $P > 0.05$ , all).

**Conclusion:** Our study shows for the first time that a single dose of chloroquine (0.3 mg/kg i.v.) could afford significant protection of the injured rat kidney.

**Citation:** Todorovic Z, Medic B, Basta-Jovanovic G, Radojevic Skodric S, Stojanovic R, et al. (2014) Acute Pretreatment with Chloroquine Attenuates Renal I/R Injury in Rats. PLoS ONE 9(3): e92673. doi:10.1371/journal.pone.0092673

**Editor:** Nick Ashton, The University of Manchester, United Kingdom

**Received:** November 12, 2013; **Accepted:** February 25, 2014; **Published:** March 28, 2014

**Copyright:** © 2014 Todorovic et al. This is an open-access article distributed under the terms of the Creative Commons Attribution License, which permits unrestricted use, distribution, and reproduction in any medium, provided the original author and source are credited.

**Funding:** This work was supported by the Ministry of Education, Science and Technological Development of the Republic of Serbia (Project No. 175023). The funders had no role in study design, data collection and analysis, decision to publish, or preparation of the manuscript.

**Competing Interests:** The authors have declared that no competing interests exist.

\* E-mail: mprostran@doctor.com

## Introduction

Acute kidney injury (AKI), previously referred to as acute renal failure (ARF), is a heterogeneous process, that is usually classified into three different groups: (a) prerenal, which is an adaptive mechanism of severe renal damage (hypovolemia and/or hypotension), (b) intrinsic, which is structural renal injury and (c) postrenal, which represents mechanical obstruction of the urinary system. Renal ischemia-reperfusion (I/R) injury is one of the most common causes of prerenal AKI [1].

Despite novel therapeutic strategies, I/R injury remains an unresolved problem in pharmacotherapy with high mortality rate, especially in critically ill patients. Hospital mortality has not decreased significantly over last sixty years and it varies from 28% to 90% [2].

The important role of inflammation in the development of renal ischemia-reperfusion injury is confirmed in many studies [3,4]. Some clinical and a lot of experimental data suggest that I/R refers to a complex inflammatory process that includes leukocyte

trafficking, synthesis of pro-inflammatory cytokines such as interleukin (IL)-1, IL-6 and tumor necrosis factor (TNF)- $\alpha$ , increasing in cell adhesion-molecule expression, development of oxidative stress, changes in permeability of membrane ion and water-channel expression, dysfunction in calcium homeostasis, phospholipase and protease activation etc. [5,6].

Mainly, oxidative stress in the kidney is caused by polymorphonuclear (PMN) and macrophages infiltration and production of reactive oxygen species (ROS) and reactive nitrogen species. On the other hand, there is an evidence that some NO-donor at low concentration can reduce inflammation during I/R injury [7].

Also, different authors have recently confirmed that autophagy is induced in renal tubular cells during AKI [8].

Some increasing evidence suggests that antiinflammatory and antimalarial drug, chloroquine, which is also a pharmacological inhibitor of autophagy, may influence renal function by stimulating a significant increase in urine flow rate, glomerular filtration rate and sodium excretion. The effects of chloroquine on renal

function probably involves stimulation of nitric oxide synthase [9]. Despite that, chloroquine has a controversial role on the expression of iNOS, a property that is responsible for many of physiological effects in organs such as the kidneys. It seems that effects of chloroquine on NO production are cell-type dependent. Some previous studies showed inhibition of iNOS activity and NO synthesis in a dose-dependent manner in a murine peritoneal macrophages that have been stimulated with IFN- $\gamma$  [10]. Also, it modulates both glomerular hemodynamics and tubular function [11].

Preventive strategies are most effective when started before oliguria and elevated serum creatinine which are delayed and unreliable markers of kidney damage. One of new promising, early biomarker is kidney injury molecule 1 (KIM-1) that is believed to participate in the regeneration process. KIM-1 is an important biomarker of AKI and acute tubular necrosis (ATN) and correlates with the degree of renal dysfunction. The KIM-1 gene (or protein) expression is undetectable in normal kidney, but this molecule is usually present in damaged tubular epithelial cells. Also, some authors detected significant increase of urinary KIM-1 in rat experimental model of I/R renal injury, without any changes in the level of plasma creatinine, creatinine clearance or proteinuria. A rapid testing method for KIM-1 has been described, yielding semiquantitative results in just 15 minutes [12,13]. One prospective study was shown that KIM-1 can even predict adverse clinical outcomes in patients with AKI: patients with the highest levels in urinary KIM-1 had the highest odds for dialysis and hospital death [14–16].

The aim of our study was to analyze the acute effects of a single-dose intravenous chloroquine administered at three different times in the experimental model of I/R in rat. The analysis would take into account selected biochemical and histological markers of glomerular and tubular function and reperfusion injury, as well as semiquantitative scoring of KIM-1 staining.

## Materials and Methods

Methods are described in detail elsewhere [14,17–19]. The experimental design is shown in Fig.1.

In brief, *in vivo* experiments were performed in male adult Wistar rats (N = 66) weighing 200–300 g ( $239 \pm 11$  g) and receiving a standard diet and water *ad libitum*. This study was carried out in strict accordance with the Animal Welfare Act of the Republic of Serbia (Official Gazette of the Republic of Serbia No. 41/09), Directive 2010/63/EU on the Protection of Animals Used for Scientific Purposes, and the Guide for the Care and Use of Laboratory Animals (National Research Council, 8<sup>th</sup> ed., USA). The protocol was approved by the Committee on the Ethics of Animal Experiments of the Faculty of Medicine, University of Belgrade (License Number: 2394/2).

The following compounds were used: chloroquine diphosphate salt (Sigma-Aldrich, Poole, Dorset, UK), sodium thiopentone (Thiopental®, Nycomed Pharma, Unterschleibheim, Germany) and nonpyrogenic saline 0.9% w/v NaCl (Hemofarm, Vršac, Serbia).

Male adult Wistar rats are anesthetized with intraperitoneal bolus injection of sodium thiopentone (120 mg/kg) and placed on their backs on thermostatically controlled heating mat to provide constant body temperature  $37.5 \pm 1$ C. Trachea, carotid artery, jugular vein and urinary bladder are separated from surrounding tissue and inserted with appropriate tubes or cannulas. Afterwards, both renal pedicles are isolated from the surrounding tissue, separated from ureter, and clamped with appropriate artery clip to reversibly stop blood supply to and from kidneys. Ischemia

(pedicles are clipped) lasted 45 min. Clips are removed from pedicles with big forceps at the beginning of reperfusion, which lasted 4 h. Saline infusion is provided during the whole experiment (8 ml/kg/h before reperfusion and 2 ml/kg/h during reperfusion). In addition, cardiovascular parameters are monitored continuously, and anesthesia is maintained by supplementary injections of thiopentone sodium (10 mg/kg, i.v.), as required. All animals received a continuous infusion of 0.9% (w/v) saline 8 ml/kg/h, i.v. during a period of adaptation (30 min) and during ischemia (45 min), and 2 ml/kg/h during reperfusion time of 4 h. At the end of all experiments, rats were euthanized using an overdose of sodium thiopentone [14].

At the beginning, chloroquine screening experiments were performed (N = 2–4 per group). Chloroquine was administered in doses of 0.3 mg/kg i.v., 3 mg/kg i.v. and 30 mg/kg i.v. 30 min before ischemia, 30 min before reperfusion and 5 min before reperfusion. Time-related differences between pretreatment were not observed in either of groups. A dose of 30 mg/kg of chloroquine caused a marked decrease in the mean arterial pressure during the i.v. application, so in this paper we will only discuss the effects of the lower doses.

Rats were randomized into six experimental groups (N = 6–10 per group):

- I: Sham-operated + saline (0.9% NaCl),
- II: IR + saline,
- III: IR + chloroquine 0.3 mg/kg, 30 min before ischemia (IR + H03-30I),
- IV: IR + chloroquine 0.3 mg/kg, 30 min before reperfusion (IR + H03-30R),
- V: IR + chloroquine 0.3 mg/kg, 5 min before reperfusion (IR + H03-5R),
- VI: IR + chloroquine 3 mg/kg, 30 min before ischemia (IR + H3-30I).

In all groups during reperfusion urine was collected, and after the end of the experiment, blood samples were taken and analyzed for markers of renal impairment (sUr, SCr, FENa<sup>+</sup>).

Fractional excretion of sodium (FENa<sup>+</sup>) is calculated using standard formula incorporating the ratio of serum and urinary sodium concentrations (sNa and uNa), clearance of creatinine (Ccr) and urine flow [14].

Also, *post mortem* samples of both kidneys of each animal were taken for histological evaluation. The samples of kidney were placed in formalin and processed through to wax, subsequently sectioned at 5  $\mu$ m and stained with PAS (Periodic acid-Schiff). Original magnification  $\times 20$  was used. Each figure shown was randomly chosen from the series of at least 6 experiments (electronic light microscope type Leica DM LS 2, type 11020518016, Microsystems, Wetzlar, Germany). The kidney samples were then graded histologically according to the severity of injury by using a predetermined scoring system [20]. The histological score evaluated were tubular necrosis, interstitial edema, loss of brush border and casts formation. A minimum of 10 fields for each kidney slide were examined and assigned for severity of changes. The scoring system used was 0, absent; 1, minimal changes, 2, moderate changes and 3, marked changes. Total score per kidneys was calculated by addition of all scores. It should be pointed out that blinded analysis of the histological samples was performed by two experts (Department of Pathology, Faculty of Medicine, University of Belgrade).

Chloroquine (0.3 mg/kg, i.v.) 30 min before I, 30 min before R or 5 min before R

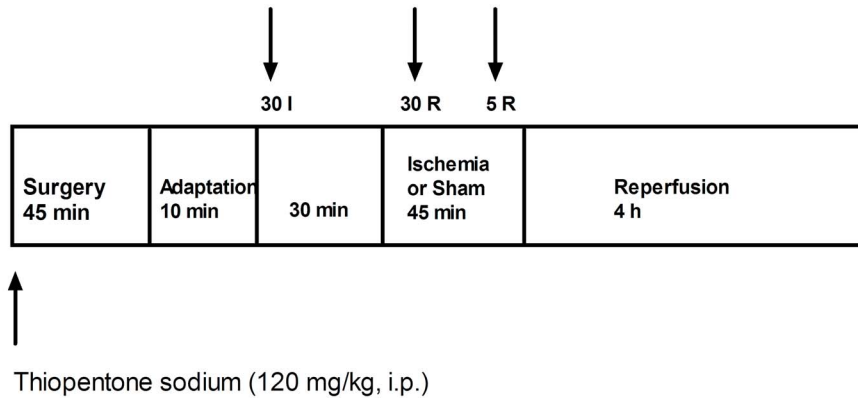

**Figure 1. Experimental design.** Chloroquine was injected 30 min before ischemia, 30 min before reperfusion, and 5 min before reperfusion (30I-, 30R- and 5R-group, respectively).  
doi:10.1371/journal.pone.0092673.g001

### Immunohistochemistry

Mouse monoclonal antibody to KIM-1 (MAB1750) was purchased by R&D systems Europe (Abingdon, UK). Sections (5- $\mu$  thick) from the formalin-fixed, paraffin-embedded tissue samples were deparaffinized and treated with 3% hydrogen peroxide for 15 min to block endogenous peroxidase activity. For the heat-induced antigen retrieval, tissue sections were immersed in 0.01 mol/L citrate buffer (pH=6.0) and treated in a microwave oven for 20 min at 620 W. After cooling off for 30 min at room temperature, blocking peptide (DAKO, Glostrup, Denmark) was utilized to block the non-specific staining and primary antibody, diluted 1:20, was applied overnight, at 4°C. Streptavidin-biotin technique using DAKO's LSAB+ kit (DAKO, Denmark) was applied, with diaminobenzidine (DAB) as the chromogen solution and Mayer's hematoxylin for the counterstain. Normal epithelial tissue was included in every staining procedure as a positive control for KIM-1, whereas incubation with the pure antibody diluent (without the primary antibody) served as a negative control. During the development of immunohistochemical protocol for KIM-1 detection, we performed immunostaining with monoclonal and polyclonal antibodies. As positive control we used testicular tissue, considering the fact that abundant KIM-1 expression can be detected in kidney and testis with application of polyclonal anti KIM-1 antibody. For negative control, we left out primary antibody during immunostaining procedure.

As we obtained identical results using monoclonal and polyclonal antibodies in several analyzed samples as well as in positive and negative control, we carried on our experiment with monoclonal antibody.

Similarity between human and rat extracellular domain of Kim-1 protein, was determined by comparison of amino acid sequences. Using the UniProt database, amino acid sequences of human and rat Kim-1 were accessed by following entries Q96D42 and O54947, respectively. Sequence alignment was performed by using BLAST tool.

These domains show 57% of sequence identity (E-value 5e-41) and most of differences are due to the existence of repeated elements in human EC domain of Kim-1. The Ig like V subdomain of EC domain is characterized by 57% (E-value 2e-39). Similarity between human and rat Kim-1 EC domain suggests that structural conditions are fulfilled for equalization of ligand binding and overall biochemical similarity. The sequence conser-

vation in both species suggests the significant selective pressure against sequence alteration during evolution of Kim-1 gene. The human anti-EC Kim-1 Mab binds to the same domain of rat's Kim-1, leading to a conclusion that experimental results based on rat's model could be seriously taken into concern for extrapolation to humans [21,22].

Localisation of immunohistochemical staining was assessed by light microscopy. Brown-coloured products in the cytoplasm identified positive staining. The results of immunohistochemical staining were scored by semiquantitative technique: absence of staining in all epithelial cells (negative staining); positive staining involving less than 10% of cells (focal expression; +), 10%–50% positive cells (moderate expression), and more than 50% positive cells (diffuse expression).

Kidney injury molecule-1 positive staining intensity in proximal tubules of all samples was evaluated manually. The staining intensity score of targeted and control epithelial cells was graded from 0 to 3 according to scoring system described by Zang et al. [23].

The KIM-1 staining intensity score for each sample was graded by two experts in the field of pathology who was blinded to the group assessments.

### Statistical analysis

All values described in the text and figures are expressed as the mean  $\pm$  standard error of the mean (S.E.M.) of *n* observations. For *in vivo* studies, each data point represents biochemical measurements or histological scores obtained from 6–10 separate animals. Statistical analysis was carried out using one-way analysis of variance (ANOVA) followed by *Bonferroni's* post-hoc test. Correlation between KIM-1 staining score and other results and scores was assessed using nonparametric Spearman test. All mentioned statistical analysis was performed by using GraphPad Prism/Instat 1.1 (GraphPad Software, San Diego, CA, USA). A *P* value of less than 0.05 was considered significant (NS = *P*>0.05 = non significant).

### Results

Neither saline nor chloroquine at doses of 0.3 mg/kg and 3 mg/kg affected the mean arterial pressure (MAP) and heart rate (HR) of anesthetized rats (not shown). On the other hand, chloroquine in dose of 30 mg/kg led to a major decrease in MAP,

without significant changes in HR. In rats subjected to I/R injury, renal artery occlusion per se caused a transient fall in MAP and HR.

I/R injury significantly increased serum urea and creatinine concentrations (sUr, sCre) and fractional excretion of sodium (FENa<sup>+</sup>) (IR + Saline vs. Sham + Saline; P<0.01) (Fig. 2A–C)

Chloroquine (0.3 mg/kg i.v) significantly reduced sCre regardless of the time of injection in comparison with control group (IR + H03-30I, IR + H03-30R and IR + H03-5R vs. IR + Saline; P<0.01). However, chloroquine in dose of 3 mg/kg, i.v. reduced, but did not completely abolished the effects of I/R injury (IR + H3-30I vs. IR + Saline; P<0.05) (Fig. 2A)

Also, chloroquine in the lowest dose reduced sUr and FENa<sup>+</sup> in comparison with control group (IR + H03-30I vs. IR + Saline; P<0.05). Time-related differences between pretreatments were not observed (IR + H03-30I and IR + H03-30R vs. IR + H03-5R; P>0.05, all) (Fig. 2B, C).

I/R injury caused a marked increase in total histological score in comparison with sham-operated animals (IR + Saline vs. Sham + Saline; P<0.01). Chloroquine (0.3 mg/kg i.v., administered at three different times; 3 mg/kg i.v., 30 I) reduced tubular necrosis score in comparison with control group (IR + H03-30I, IR + H03-30R, IR + H03-5R and IR + H3-30I vs. IR + Saline; P<0.05) (Fig. 3A). Time-related differences between three administrations of chloroquine were not observed (IR + H03-30I and IR + H03-30R vs. IR + H03-5R; P>0.05, all) (Fig. 3B–D).

Also, both doses of chloroquine significantly reduced total histological score (IR + H03-30I, IR + H03-30R, IR + H03-5R and IR + H3-30I vs. IR + Saline; P<0.05) (Fig. 4A). Representative light photomicrographs of a kidney section taken from rats colored with PAS are shown in Fig. 4B–G.

I/R injury caused a marked increase in KIM-1 staining in comparison with sham-operated animals (IR + Saline vs. Sham + Saline; P<0.01). Chloroquine in dose of 0.3 mg/kg i.v. signifi-

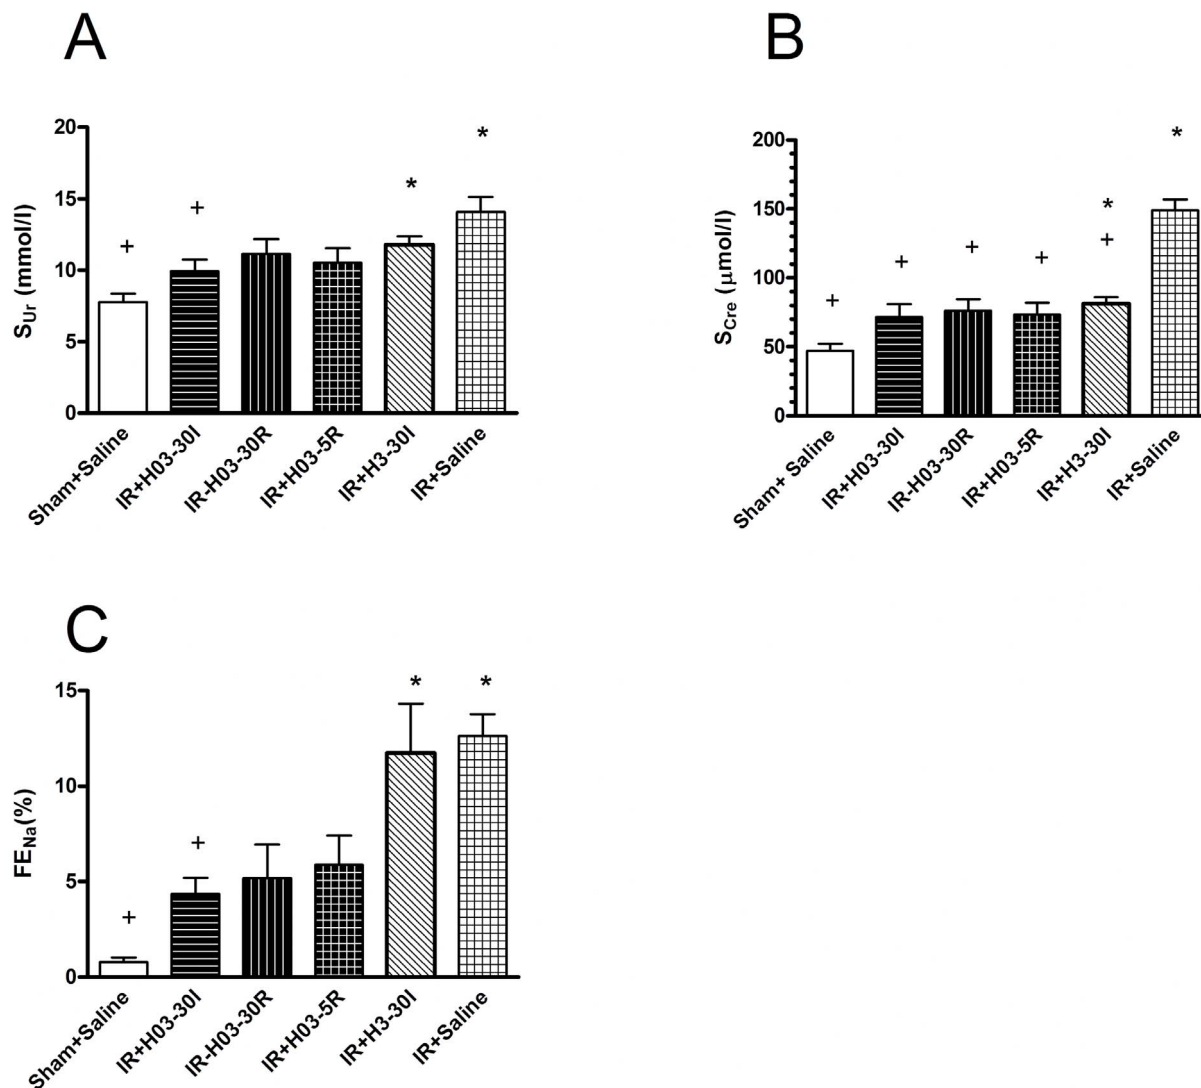

**Figure 2. The effects of chloroquine (0.3 mg/kg, i.v.; 3 mg/kg, i.v.) on renal dysfunction and injury caused by I/R.** Chloroquine in dose of 0.3 mg/kg, i.v. was injected 30 min before ischemia (IR+H03-30I), 30 min before reperfusion (IR+ H03-30R) and 5 min before reperfusion (IR+H03-5R), and in dose of 3 mg/kg, i.v. was injected 30 min before ischemia (IR+H3-30I). Control groups, Sham+Saline and IR+ Saline received an i.v. bolus of 0.5 ml saline only. Panel A, B, and C: serum creatinine and urea concentrations and fractional excretion of Na<sup>+</sup>. Each bar represents mean ± S.E.M. +: P<0.05 vs. IR+Saline, \*: P<0.05 vs. Sham+Saline (N = 6–10 rats). doi:10.1371/journal.pone.0092673.g002



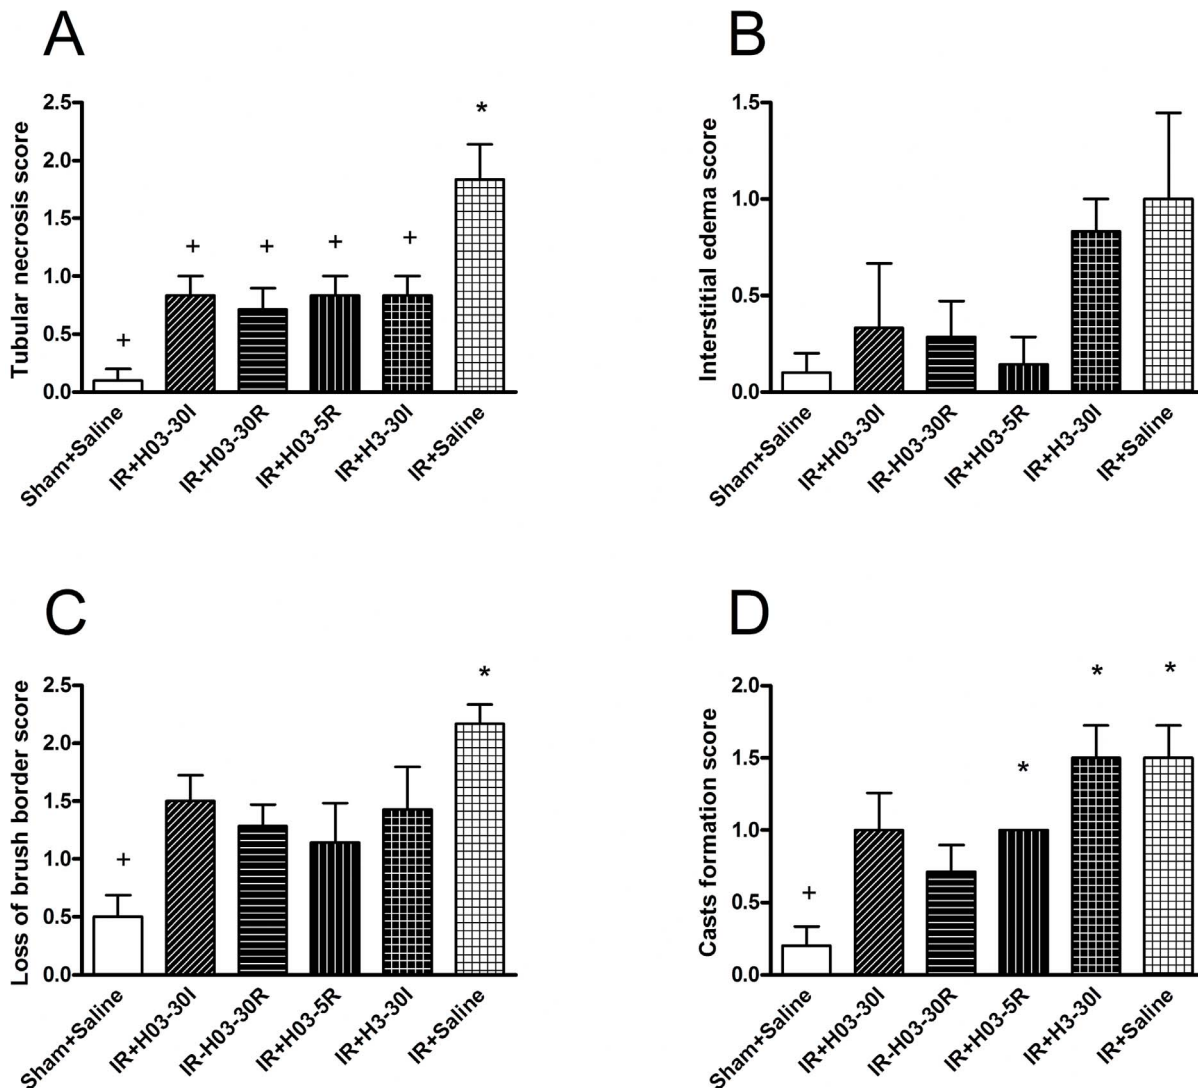

**Figure 3. The effects of chloroquine (0.3 mg/kg; 3 mg/kg, i.v. bolus) on histological score of renal I/R injury.** Chloroquine in dose of 0.3 mg/kg, i.v. was injected 30 min before ischemia (IR+H03-30I), 30 min before reperfusion (IR+H03-30R) and 5 min before reperfusion (IR+H03-5R), and in dose of 3 mg/kg, i.v. was injected 30 min before ischemia (IR+H3-30I). Control groups, Sham+Saline and IR+ Saline received an i.v. bolus of 0.5 ml saline only. The histological parameters evaluated were tubular necrosis, interstitial edema, loss of brush border, and cast formation score (Panels A–D). A minimum of 10 fields for each kidney slide were examined and assigned for severity of changes. The scoring system was as follows: 0, absent; 1, minimal changes; 2, moderate changes and 3, marked changes. Each bar represents mean  $\pm$  S.E.M. +:  $P < 0.05$  vs. IR+Saline, \*:  $P < 0.05$  vs. Sham+Saline (N = 6–10 rats). doi:10.1371/journal.pone.0092673.g003

cantly reduced the KIM-1 score when compared to IR + Saline group (IR + H03-30I vs. IR + Saline;  $P < 0.01$ ), while dose of 3 mg/kg i.v. also reduced, but not completely abolished I/R-caused renal injury (IR + H3-30I vs. Sham + Saline;  $P < 0.05$ ). (Fig. 5A).

Representative light photomicrographs of kidney section taken from rats subjected to immunohistochemical staining for KIM-1 are shown at Fig. 5B–G.

In our study, we checked correlations between both biochemical and histological parameters of I/R injury and KIM-1 staining in all subjected groups. We found highly positive correlation of KIM-1 staining scores with sCre ( $r = 0.8463$ ;  $p < 0.0001$ ; CI 0.6874 to 0.9279) and total histological score ( $r = 0.8093$ ;  $p < 0.0001$ ; CI 0.5884 to 0.9178). KIM-1 expression was also positively associated with proximal tubular necrosis score ( $r = 0.6538$ ;  $p < 0.001$ ; CI 0.3204 to 0.8431), cast formation score ( $r = 0.6405$ ;  $p < 0.001$ ; CI

0.2998 to 0.8363) and sUr ( $r = 0.6422$ ;  $p < 0.001$ ; CI 0.3467 to 0.8217).

## Discussion

I/R injury that often leads to AKI still remains an unresolved problem in pharmacotherapy. Acute tubular necrosis due to I/R injury in patients is associated with a high mortality rate and there has not been significant progress in therapy in the past few decades [24–27]. In this paper, we have shown that pretreatment with chloroquine (0.3 mg/kg, i.v. bolus) causes substantial reduction in biochemical and histological parameters and, also, in KIM-1 staining score.

Chloroquine, well-known antimalarial drug, possesses some other, so called pleiotropic effects: antiinflammatory, anticoagulant and vascular actions. Also, there is evidence that chloroquine

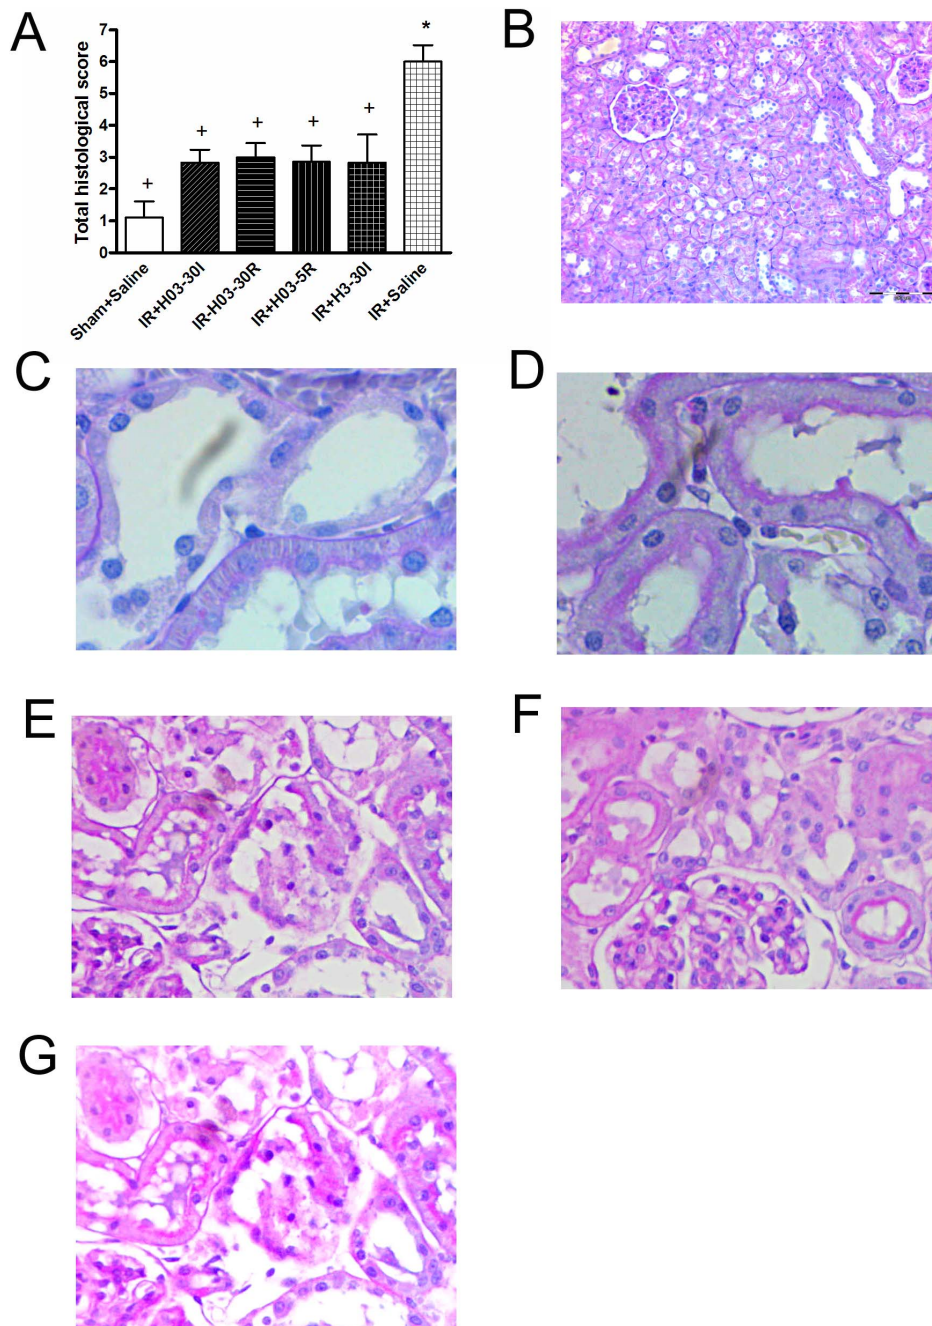

**Figure 4. The effects of chloroquine (0.3 mg/kg; 3 mg/kg, i.v. bolus) on total histological score of renal I/R injury and histological micrographs of renal tissues.** Chloroquine in dose of 0.3 mg/kg, i.v. was injected 30 min before ischemia (IR+H03-30I), 30 min before reperfusion (IR+ H03-30R) and 5 min before reperfusion (IR+H03-5R), and in dose of 3 mg/kg, i.v. was injected 30 min before ischemia (IR+H3-30I). Control groups, Sham+Saline and IR+Saline received an i.v. bolus of 0.5 ml saline only. A minimum of 10 fields for each kidney slide were examined and assigned for severity of changes. The scoring system was as follows: 0, absent; 1, minimal changes; 2, moderate changes and 3, marked changes. Total histological score was calculated by addition of all scores (Panel A). Each bar represents mean  $\pm$  S.E.M. +:  $P < 0.05$  vs. IR+Saline, \*:  $P < 0.05$  vs. Sham+Saline (N = 6–10 rats). Histological micrographs of renal tissues: kidney sections taken from Sham-operated rats or rats subjected to renal I/R injury. Periodic acid–Schiff (PAS) stain coloring. Original magnification  $\times 20$ . Figures were randomly chosen from the series of at least 6 experiments (Panels B–G). Panel B: Sham-operated animals treated with saline only (Sham+Saline group) - normal renal parenchyma (PAS staining). Panel C: Rats subjected to renal I/R injury, pretreated with chloroquine at 0.3 mg/kg, i.v. 30 min before ischemia (IR+H03-30I group) - moderate kidney damage, about half of proximal tubules show loss of brush border, dilatation of lumen and loss of nuclei in some epithelial cells. Panel D: Rats subjected to renal I/R injury, pretreated with chloroquine at 0.3 mg/kg, i.v. 30 min before reperfusion (IR+ H03-30R group) - moderate kidney damage, loss of brush border was observed in half of proximal tubules, in addition to dilatation of lumen and loss of nuclei in some epithelial cells. Panel E: Rats subjected to renal I/R injury, pretreated with chloroquine at 0.3 mg/kg, i.v. 5 min before reperfusion (IR+H03-5R group) - moderate kidney damage, two thirds of proximal tubules show loss of brush border, dilatation of lumen and loss of nuclei in numerous epithelial cells. Panel F: Rats subjected to renal I/R injury, pretreated with chloroquine at 3 mg/kg, i.v. 30 min before ischemia (IR+H3-30I group) - moderate kidney damage, two thirds of proximal tubules show loss of brush border, dilatation of lumen and loss of nuclei in majority of epithelial cells (marked necrosis). Panel G: Rats subjected to renal I/R injury, pretreated with saline only (IR+Saline-group) - marked kidney damage, interstitial edema diffusely present, proximal

tubules show loss of brush border and lumen dilatation and loss of nuclei in some epithelial cells.  
doi:10.1371/journal.pone.0092673.g004

treatment could affect antioxidant enzymes and has a favorable effect on serum lipid profile and glucose concentrations. It seems that these effects of chloroquine are dose-dependent [28–35].

In our study we examined chloroquine pretreatment at doses of 0.3 mg/kg, 3 mg/kg and 30 mg/kg (i.v., bolus) 30 min before ischemia, 30 min before reperfusion and 5 min before reperfusion. Time-related differences between pretreatments were not observed in either of groups. Of note, dose-range interval for chloroquine treatment in humans is similar (it goes between 2.5–25 mg/kg daily) [36]. A dose of 30 mg/kg of chloroquine per se caused a marked decrease in the mean arterial pressure during the i.v. application, which could be explained by vasodilatation and cardiac depression in rats [37]. So, in this paper we have discussed the effects of the lower doses of chloroquine.

We showed for the first time that chloroquine in the lowest dose (0.3 mg/kg, i.v.) significantly reduced some biochemical (sUr, sCre, FENa<sup>+</sup>), histological parameters (total histological score, tubular necrosis score) and attenuates KIM-1 staining score. It should be pointed out that chloroquine in dose of 3 mg/kg has also shown some protective effects, but not completely abolished renal I/R injury in rats.

Kidney injury molecule-1 (KIM-1) is a type 1 transmembrane glycoprotein which is normally minimally expressed in kidney tissue or urine [38–40]. It is believed that KIM-1 plays a role in the process of both kidney injury and healing, but precise mechanism of KIM-1 restoration of tubular integrity after injury is not fully understood. In the past 15 years (1998–2013) Edelstein and collaborators have published several papers on the importance and clinical applicability of new biomarkers of acute renal failure. Recently, his team has demonstrated that in ischemic injury KIM-1 expression is most prominent in the S3 segment (i.e., the segment most susceptible to ischemic injury) [41].

In our experimental model, first changes in standard biomarkers of acute renal failure due to I/R injury could be detected within two hours after the beginning of reperfusion [14]. After four hours of reperfusion, there is clear and reliable increase in serum creatinine, urea and fractional excretion of sodium due to I/R injury (Fig. 2). Moreover, the protective effect of a single i.v. dose of chloroquine (0.3 mg/kg i.v.) on kidney function and morphology was shown using the same biomarkers. KIM-1 expression is more sensitive than normal histology for detection of low-grade proximal tubule injury [42]. In the present experiments KIM-1 changes over time were not assessed.

Many preclinical animal studies showed that urinary KIM-1 was an early biomarker of AKI in mice and rats (animals were subjected to ischemic injury lasting 10 min or longer). Changes in urinary KIM-1 correlated with KIM-1 immunostaining in the proximal tubular epithelial cells [43–46].

There are several possible explanations of our findings, and both pharmacodynamic and pharmacokinetic factors should be taken into consideration.

First of all, pharmacokinetic profile of chloroquine allows us to suppose that it easily reaches the kidney [47]. Current evidence suggests that chloroquine may affect kidney function administered either acutely or chronically in rats, probably due to its accumulation in kidney cells [48,49]. The deposition of chloroquine in the epithelial tubular cells may alter perfusion pressure of the kidney and renal haemodynamics, also affecting renal fluid and electrolyte handling. It is shown that it can stimulate significant increase in urine flow rate, glomerular filtration rate and sodium excretion [9].

The explanation of chloroquine pharmacodynamics in the present model of I/R injury should take into consideration its effect on endothelial NO production. The effects of chloroquine on renal function probably involve stimulation of nitric oxide synthase [11,50]. The stimulatory effects of chloroquine on NO production were also demonstrated in mouse, pig and human endothelial cells *in vitro* [51]. Enhancements of the NO level by chloroquine potentiate vasodilatation of resistant vessels, leading to preservation of tissue perfusion after I/R injury.

Nevertheless, we have already discussed the anti-inflammatory effects of chloroquine. It was shown that it decreases the production of some proinflammatory cytokines, but also exerts anti-inflammatory effects via non-lysosomotropic mechanism [27,52].

Synthesis of proinflammatory cytokines such as interleukin (IL)-1, IL-6 and tumor necrosis factor (TNF)- $\alpha$ , increasing in cell adhesion-molecule expression, development of oxidative stress are just some of the changes that occur during acute kidney injury. It is shown that chloroquine treatment inhibits production of IL-1 and IL-6 in human monocytes and T cells [53]. Some recent studies show that chloroquine administration attenuates the decline in renal function and production of typical serum pro- and anti-inflammatory cytokines TNF- $\alpha$  and IL-10 [54]. Other authors confirmed that chloroquine exerts some anti-inflammatory effects through the down-regulation of (TNF)- $\alpha$  production and signaling in macrophages, as well as the cytokine pattern production [55].

Also, chloroquine, as a cationic drug, accumulates in acidic cellular compartments and binds to phospholipids with a consequent increase in lysosomal pH and induce phospholipidosis. It seems that impairment of lysosomal function by chloroquine leads to anti-inflammatory effects by inhibition of arachidonic acid release and prostaglandin E2 synthesis [56]. Cooper and colleagues considered that lysosomotropic effects of chloroquine are widely responsible for its anti-inflammatory properties (decreasing in production of proinflammatory cytokines such as: IFN- $\gamma$ , TNF- $\alpha$ , IL-1, IL-6), but also emphasized the importance of non-lysosomotropic mechanisms (it was shown that chloroquine could inhibit TNF- $\alpha$  release in macrophages through inhibition of TNF- $\alpha$  mRNA synthesis) [10].

Despite this, chloroquine is well-known as an autophagy inhibitor. Autophagy is induced in renal tubular cells during acute kidney injury; it was not obvious during the ischemia period, but was significantly enhanced during reperfusion. Some authors considered that autophagic effects of chloroquine are concentration dependent and that would be critical to measure actual concentrations, not only in blood, but also in tissue [57]. However, whether this autophagy during I/R injury is protective or injurious remains controversial. Some increasing evidence suggests that autophagy may provide a protective mechanism for cell survival [58–61]. On the other hand, some authors describe a dual role of chloroquine in liver I/R injury: reduction of damage in early phase (0–6 h after reperfusion), but aggravation in late phase (24–48 h after reperfusion). The mechanism of protection involving modulation of mitogen-activated protein kinase activation and inflammatory cytokine production, whereas chloroquine worsened liver injury *via* inhibition of autophagy [62].

Finally, we should not rule out other potentially protective mechanisms of chloroquine in I/R injury such as inhibition of stimulation by Toll-like receptors and prostaglandin synthesis, effects on PARP and PPAR receptors etc. [51].



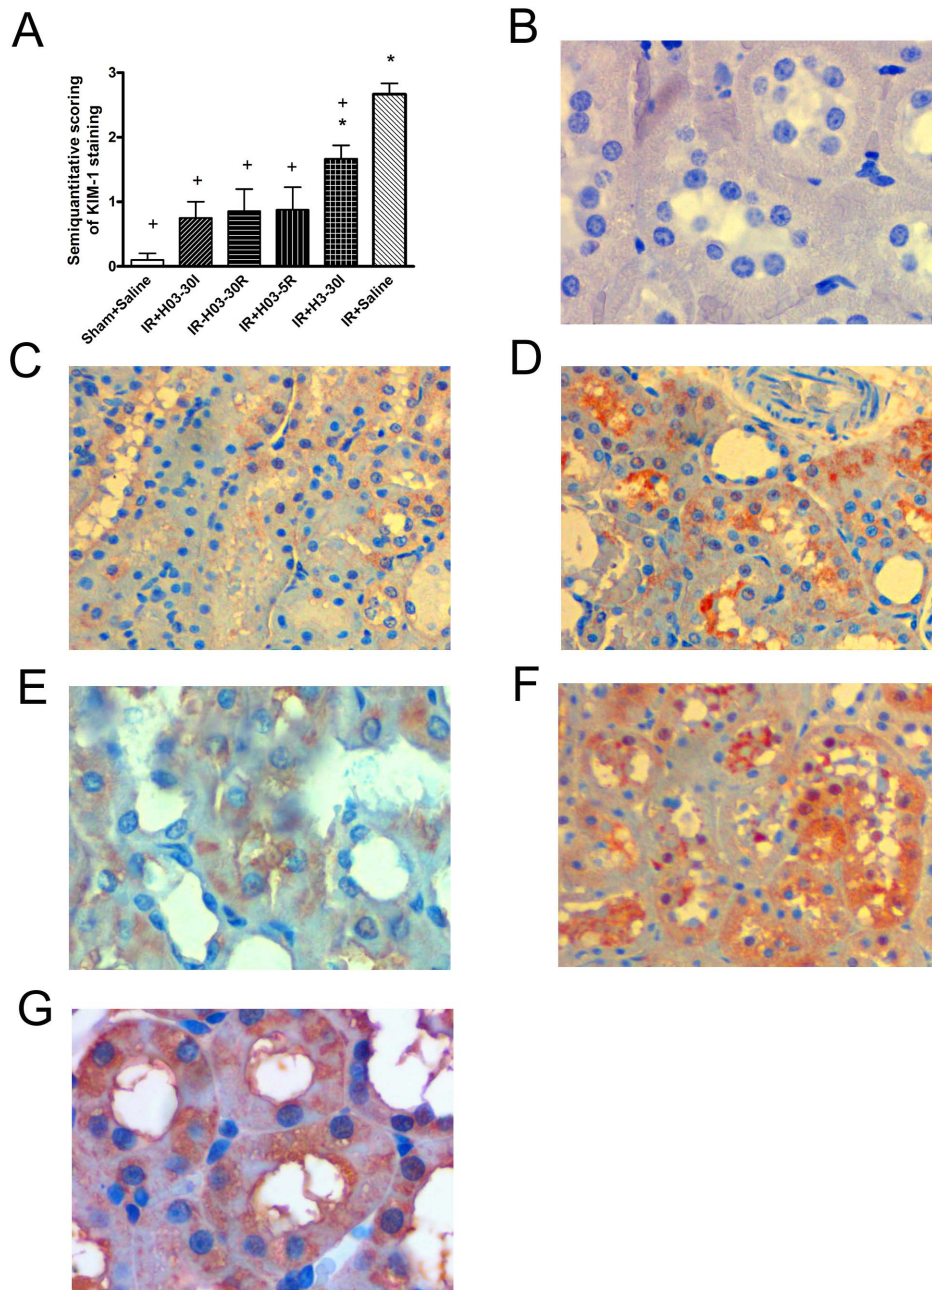

**Figure 5. The effects of chloroquine (0.3 mg/kg, i.v; 3 mg/kg, i.v.) on KIM-1 staining score of renal I/R injury and histological micrographs of renal tissues.** Chloroquine in dose of 0.3 mg/kg, i.v. was injected 30 min before ischemia (IR+H03-30l), 30 min before reperfusion (IR+ H03-30R) and 5 min before reperfusion (IR+H03-5R), and in dose of 3 mg/kg, i.v. was injected 30 min before ischemia (IR+H3-30l). Control groups, Sham+Saline and IR+ Saline received instead of drug i.v. bolus of 0.5 ml saline only. The following scoring system was used: 0, no staining; 0.5+, focal weak fine granular staining; 1+, weak fine granular staining; 2+, moderate granular staining; and 3+, strong large granular staining. The KIM-1 staining intensity score for each sample was graded by two experts in the field of pathology who was blinded to the group assessments. Finally, KIM-1 staining density score for each sample calculated using mean score of these two experts (mean score  $\pm$  S.E.M.) (Panel A). Each bar represents mean  $\pm$  S.E.M. +:  $P < 0.05$  vs. IR+Saline, \*:  $P < 0.05$  vs. Sham+Saline (N = 6–10 rats). Histological micrographs of renal tissues: kidney sections taken from Sham-operated rats or rats subjected to renal I/R injury. Kidney injury molecule-1 (KIM-1) staining. Original magnification  $\times 20$ . Figures were randomly chosen from the series of at least 6 experiments (Panels B–G). Panel B: Sham-operated animals treated with saline only (Sham+Saline group) - absence of immunoreactivity for KIM-1. Panel C: Rats subjected to renal I /R injury, pretreated with chloroquine at 0.3 mg/kg, i.v. 30 min before ischemia (IR+H03-30l group) - most of proximal and some distal tubules show mild staining for KIM-1. Panel D: Rats subjected to renal I /R injury, pretreated with chloroquine at 0.3 mg/kg, i.v. 30 min before reperfusion (IR+ H03-30R group) - nearly half of proximal tubules and rare distal tubules show mild to moderate KIM staining. Panel E: Rats subjected to renal I /R injury, pretreated with chloroquine at 0.3 mg/kg, i.v. 5 min before reperfusion (IR+H03-5R group) - nearly half of proximal tubules and rare distal tubules show moderate KIM staining. Panel F: Rats subjected to renal I /R injury, pretreated with chloroquine at 3 mg/kg, i.v. 30 min before ischemia (IR+H3-30l group) - most of proximal and some distal tubules show moderate staining for KIM-1. Panel G: Rats subjected to renal I / R injury, pretreated with saline only (IR+Saline-group) - proximal and distal tubules show moderate to intensive positive KIM staining.

doi:10.1371/journal.pone.0092673.g005



## Conclusion

Our study shows for the first time that a single dose of chloroquine (0.3 mg/kg i.v.) could afford significant protection of the injured rat kidney. It is important to notice that protective effects of chloroquine in the present experimental model of I/R injury is not time-dependant, and the drug could be administered immediately before reperfusion.

Beneficial effects of acute pretreatment with a single dose of chloroquine in the rat model of renal I/R injury could be confirmed by KIM-1 staining scores. Our study provides the first evidence that KIM-1 staining scores could be used as an indicator of the therapeutic benefit of different pharmacological agents in the experimental model of renal I/R injury. KIM-1 reliably confirmed that chloroquine affords an acute protective effect on kidney function and morphology.

Further experiments are needed to assess whether chemical modifications of chloroquine molecule may influence its pharma-

codynamics and/or pharmacokinetics in the present experimental model.

## Acknowledgments

The authors are grateful to Mrs. Zorica Nešić for help in performing some of experiments. Also, we would like to thank Prof. Miroslav Radenković for help in preparing final graphic layout. The authors are grateful to Mrs. Dušanka Jovičić for help in performing biochemical analysis and to Mr. Mihailo Ruvidić in preparing representative light photomicrographs of kidney section.

## Author Contributions

Conceived and designed the experiments: ZT MP BM. Performed the experiments: ZT BM GBJ SRS. Analyzed the data: ZT BM GBJ SRS RS BR MP. Contributed reagents/materials/analysis tools: GBJ MP. Wrote the paper: ZT BM GBJ SRS RS BR MP.

## References

- Bellomo R, Ronco C, Kellum A, Mehta RI, Palevsky P (2004) Acute renal failure-definition, outcome measures, animal models, fluid therapy and information technology needs: the Second International Consensus Conference of the Acute Dialysis Quality Initiative (ADQI) Group. *Critical Care* 8(4): 204–212.
- Kunzendorf U, Haase M, Rolver L, Haase-Fielitz A (2010) Novel aspects of pharmacological therapies for acute renal failure. *Drugs* 70 (9): 1099–1114.
- Chatterjee PK, Hawksworth GM, McLay JS (1999) Cytokine-stimulated nitric oxide production in human renal proximal tubule and its modulation by natriuretic peptides: a novel immunomodulatory mechanism? *Exp Nephrol* 7: 438–448.
- Couser WG (1998) Pathogenesis of glomerular damage in glomerulonephritis. *Nephrol Dial Transplant* 13: 10–15.
- Dong X, Swaminathan S, Bachman LA, Croatt AJ, Nath KA, et al. (2007) Resident dendritic cells are the predominant TNF-secreting cell in early renal ischemia-reperfusion injury. *Kidney Int* 71: 619–628.
- Thurman JM (2007) Triggers of inflammation after renal ischemia-reperfusion. *Clin Immunol* 123: 7–13.
- Garcia-Criado FJ, Eleno N, Santos-Benito F, Valdunciel JJ, Reverte M, et al. (1998) Protective effect of exogenous nitric oxide on the renal function and inflammatory response in a model of ischemia-reperfusion. *Transplantation* 66: 982–990.
- Chatterjee PK (2007) Novel pharmacological approaches to the treatment of renal ischemia-reperfusion injury: a comprehensive review. *Naunyn-Schmiedeberg's Arch Pharmacol* 376: 1–43.
- Ahmed MH, Ashton N, Balment RJ (2003) The effect of chloroquine on renal function and vasopressin secretion: a nitric oxide-dependent effect. *J Pharmacol Exp Ther* 304: 156–161.
- Cooper RG, Magwera T (2008) Chloroquine: novel uses & manifestations. *Indian J Med Res* 127: 305–316.
- Ahmed MH, Ashton N, Balment RJ (2003) Renal function in a rat model of analgesic nephropathy: effect of chloroquine. *J Pharmacol Exp Ther* 305: 123–130.
- Coca SG, Yalavarthi R, Concato J, Parikh CR (2008) Biomarkers for the diagnosis and risk stratification of acute kidney injury: a systemic review. *Kidney Int* 73: 1008–1016.
- Vaidya VS, Ford GM, Waikar SS, Wang Y, Clement MB, et al. (2009) A rapid urine test for early detection of kidney injury. *Kidney Int* 76: 108–114.
- Todorović Z, Prostran M, Nešić Z, Stojanović R, Stojanov M (2009) The influence of drugs on biochemical markers of ischemia-reperfusion injury. In: Injac R, ed. *The Analysis of Pharmacologically Active Compounds and Biomolecules in Real Samples*. Kerala (India) Transworld Research Network. pp. 217–238.
- Martensson J, Martling CR, Bell M (2012) Novel biomarkers of acute kidney injury and failure: clinical applicability. *Br J Anaesth* 109 (6): 843–50.
- Tsigou E, Psallida V, Demponeras C, Boutzouka E, Baltopoulos G (2013) Role of new biomarkers: functional and structural damage – review article. *Critical Care Research and Practice* <http://dx.doi.org/10.1155/2013/361078>
- Nešić Z, Todorović Z, Stojanović R, Basta-Jovanović G, Radojević Škodrić S, et al. (2006) Single-dose intravenous simvastatin treatment attenuates renal injury in an experimental model of ischemia-reperfusion in the rat. *J Pharmacol Sci* 102(4): 413–417.
- Nešić Z, Todorović Z, Stojanović R, Basta-Jovanović G, Radojević Škodrić S, et al. (2008) Acute protective effects of different doses of simvastatin in the model of ischemia-reperfusion injury. *Acta Veterinaria* 58 (5–6):413–427.
- Todorović Z, Nešić Z, Stojanović R, Basta-Jovanović G, Radojević Škodrić S, et al. (2008) Acute protective effects of simvastatin in the rat model of renal ischemia-reperfusion injury: it is never too late for the pretreatment. *J Pharmacol Sci* 107: 465–470.
- Solez K, Morel-Maroger L, Sraer JD (1979) The morphology of acute tubular necrosis in man: analysis of 57 renal biopsies and a comparison with the glycerol model. *Medicine* 58: 362–366.
- Stephen FA, Thomas LM, Schäffer AA, Zhang J, Zheng Z, et al. (1997), Gapped BLAST and PSI-BLAST: a new generation of protein database search programs. *Nucleic Acids Res.* 25: 3389–3402.
- Stephen FA, Wootton JC, Gertz ME, Agarwala R, Morgulis A, et al. (2005) Protein database searches using compositionally adjusted substitution matrices. *FEBS J.* 272: 5101–5109.
- Zhang PL, Rothblum LI, Han WK, Blasick TM, Potdar S, et al. (2008) Kidney injury molecule-1 expression in transplant biopsies is a sensitive measure of cell injury. *Kidney Int* 73: 608–614.
- Chatterjee PK, Thiemeermann C (2003) An *in vivo* model of ischemia/reperfusion and inflammation of the kidney of the rat. In: Winzard PG, Willoughby DA (eds.), *Methods in Molecular Biology*, Totowa, NJ: Humana Press Inc. pp. 223–37.
- Holschermann H, Schuster D, Parviz B, Haberbosch W, Tillmanns H, et al. (2006) Statins prevent NF- $\kappa$ B transactivation independently of the IKK-pathway in human endothelial cells. *Arteriosclerosis* 185: 240–5.
- Lamiere N, Van Biesen W, Vanholder R (2005) Acute renal failure. *Lancet* 365: 417–30.
- Rouschop KM, Leemans JC (2008) Ischemia-reperfusion treatment: opportunities point to modulation of the inflammatory response. *Kidney Int* 73: 1333–5.
- Wozniacka A, Lesiak A, Narbutt J, Kobos J, Pavel S, et al. (2007) Chloroquine treatment reduces the number of cutaneous HLA-DR+ and Cd1a+ cells in patients with systemic lupus erythematosus. *Lupus* 16: 89–94.
- Van den Borne BE, Dijkman BA, de Rooij HH, le Cessie S, Verweij CL (1997) Chloroquine and hydrochloroquine equally affect tumor necrosis factor- $\alpha$ , interleukin 6, and interferon- $\gamma$  production by peripheral blood mononuclear cells. *J Rheumatol* 24: 55–60.
- Petri M (1996) Hydroxychloroquine use in the Baltimore Lupus Cohort: effects on lipids, glucose and thrombosis review. *Lupus* 1(5 Suppl): S16–22.
- Wallace DJ (1987) Does hydroxychloroquine sulfate prevent clot formation in systemic lupus erythematosus (letter). *Arthritis Rheum* 30: 1435–6.
- Petri M (1996) Thrombosis and systemic lupus erythematosus: the Hopkins lupus Cohort perspective. *Scand J Rheumatol* 25: 191–3.
- Magwera T, Naik Yogeshkumar SN, Hasler JA (1997) Effects of chloroquine treatment on antioxidant enzymes in rat liver and kidney. *Free Radic Bio Med* 22 (1-2): 321–327.
- Gerstein HC, Thorpe KE, Taylor DW, Haynes RB (2002) The effectiveness of hydroxychloroquine in patients with type 2 diabetes mellitus who are refractory to sulfonylureas: a randomized trial. *Diabetes Res Clin Pract* 55: 209–19.
- Bevan AP, Krook A, Tikerpa J, Seabright PJ, Siddle K, et al. (1997) Chloroquine extends the lifetime of the activated insulin receptor complex in endosomes. *J Biol Chem* 272: 26833–40.
- Chiodini P, et al. (2009) HPA Advisory Committee on Malaria Prevention in UK Travellers. Guidelines for malaria prevention in travellers from the United Kingdom (issued 01/07). Available at: [Link](http://www.hpa.gov.uk) (Accessed 2012 September 4).
- Sofola OA, Olude IO, Adegoke F (1981) The effects of chronic chloroquine toxicity on blood pressure of rats. *J Trop Med Hyg* 84: 249–52.
- Ichimura T, Bonventre JV, Bailly V, et al. (1998) Kidney injury molecule (KIM-1), a putative epithelial cell adhesion molecule containing a novel immunoglobulin domain, is up-regulated in renal cells after injury. *J Biol Chem* 273 (7): 4156–4142.

39. Ichimura T, Asseldonk EJ, Humphreys BD, Gunaratnam L, Duffield JS, et al. (2008) Kidney injury molecule-1 is a phosphatidylserine receptor that confers a phagocytic phenotype on epithelial cells. *J Clin Invest* 118: 1657–1668.
40. Bonventre JV (2009) Kidney injury molecule (KIM-1): a urinary biomarker and much more. *Nephrol Dial Transplant* 24: 3265–3268.
41. Ichimura T, Hung CC, Yang SA, Stevens JL, Bonventre JV (2004) Kidney injury molecule-1: a tissue and urinary biomarker for nephrotoxicant-induced renal injury. *Am J Physiol Renal Physiol* 286: 552–563.
42. Urbaschat A, Obermuller N, Haferkamp A (2011) Biomarkers of kidney injury. *Biomarkers* 16 (Suppl. 1): S22–30.
43. Vaidya VS, Ferguson MA, Bonventre JV (2008) Biomarkers of acute kidney injury. *Annu Rev Pharmacol Toxicol* 48: 463–493.
44. Edelstein CL (2008) Biomarkers of acute kidney injury. *Adv Chronic Kidney Dis* 15: 222–234.
45. Slocum JL, Heung M, Pennathur S (2012) Marking renal injury: can we move beyond serum creatinine? *Transl Res* 159: 277–289.
46. McDuffie JE, Ma JY, Sablad M, Sonee M, Varacallo L, et al. (2013) Time course of renal proximal tubule injury, reversal, and related biomarker changes in rats following cisplatin administration. *Int J Toxicol* 32(4): 251–60.
47. Gustafsson LL, Walker O, Alvan G, Beermann B, Estevez F, et al. (1983) Disposition of chloroquine in man after single intravenous and oral doses. *Br J Clin Pharmacol* 15: 471–9.
48. Musabayane CT, Ndhlovu CE, Mamutse G, Bwititi P, Balment RJ (1993) Acute chloroquine administration increases renal sodium excretion. *J Trop Med Hyg* 96: 305–10.
49. Musabayane CT, Windle RJ, Forling ML, Balment RJ (1996) Arginine vasopressin mediates the chloroquine induced increase in renal sodium excretion. *Trop Med Int Health* 1: 542–50.
50. Ahmed MH, Osman MM (2007) Why does chloroquine impair renal function, chloroquine may modulate the renal tubular response to vasopressin either directly by inhibiting cyclic AMP generation, or indirectly via nitric oxide. *Med Hypotheses* 68: 140–3.
51. Ghigo D, Aldieri E, Todde R, Costamagna C, Garbarino G, et al. (1998) Chloroquine stimulates nitric oxide synthesis in murine, porcine, and human epithelial cells. *J Clin Invest* 102: 595–605.
52. Weber SM, Levitz SM (2000) Chloroquine interferes with lipopolysaccharide-induced TNF-alpha gene expression by a nonlysosomal mechanism. *J Immunol* 165: 1534–40.
53. Sperber K, Quraishi H, Kalb TH, Panja A, Stecher V, et al. (1993) Selective regulation of cytokine secretion by hydroxychloroquine: inhibition of interleukin 1 alpha (IL-1-alpha) and IL-6 in human monocytes and T cells. *J Rheumatol* 20(5): 803–8.
54. Yasuda H, Leelahavanichkul A, Tsunoda S, Dear JW, Takahashi Y, et al. (2008) Chloroquine and inhibition of Toll-like receptor 9 protect from sepsis-induced acute kidney injury. *Am J Physiol Renal Physiol* 294(5): F1050-F1058.
55. Thome R, Moraes AS, Bombeiro AL, Farias AS, Francelin C, et al. (2013) Chloroquine treatment enhances regulatory T cells and reduces the severity of experimental autoimmune encephalomyelitis *PlosOne* 8(6): e65913.
56. Nujic K, Banjanac M, Munic V, Polancec D, Erakovic Haber V (2012) Impairment of lysosomal functions by azithromycin and chloroquine contributes to anti-inflammatory phenotype. *Cell Immunol* 279(1): 78–86.
57. Kalla S, Dutz JP (2007) New conceptions in antimalarial use and mode of action. *Dermatol Ther* 20: 160–74.
58. Jiang M, Liu K, Luo J, Dong Z (2010) Autophagy is a renoprotective mechanism during in vitro hypoxia and in vivo ischemia-reperfusion injury. *Am J Pathol* 176 (3): 1181–92.
59. Jiang M, Wei Q, Dong G, Komatsu M, Su Y, et al. (2012) Autophagy in proximal tubules protects against acute kidney injury. *Kidney Int* 82 (12): 1271–83.
60. Fang H, Liu A, Dahmen U, Dirsch O (2013) Dual role of chloroquine in liver ischemia reperfusion injury: reduction of liver damage in early phase, but aggravation in late phase. *Cell Death Dis* doi: 10.1038/cddis.2013.225
61. Harhaji-Trajkovic L, Arskin K, Kravic-Stevovic T, Petricevic S, Tovilovic G, et al. (2012) Chloroquine-mediated lysosomal dysfunction enhances the anticancer effects of nutrient deprivation. *Pharm Res* 29 (8): 2249–63.
62. Solomon RJ, Lee H (2009) Chloroquine and its analogs: a new promise of an old drug for effective and safe cancer therapies. *Eur Jour of Pharm* 625: 220–233.
